1 School-going learners are more likely to access HIV and contraceptive care at locations with friendly  
2 providers, Wi-Fi and other value-added services: Findings from a discrete choice experiment among  
3 learners in Gauteng, South Africa.

4  
5 Caroline Govathson<sup>b</sup>, Lawrence Long<sup>ab</sup>, Aneesa Moolla<sup>b</sup>, Sithabile Mngadi-Ncube<sup>b</sup>, Nkosinathi  
6 Ngcobo<sup>b</sup>, Constance Mongwenyana<sup>b</sup>, Naomi Lince-Deroche<sup>c</sup>, Sophie Pascoe<sup>b</sup>

7  
8 <sup>a</sup> Department of Global Health, Boston University School of Public Health, Boston, MA, USA.

9 <sup>b</sup> Health Economics and Epidemiology Research Office, Faculty of Health Sciences, University of the  
10 Witwatersrand

11 <sup>c</sup> Independent Consultant, Johannesburg, South Africa

12

13

14 **Running title:** High school students' preferences for HIV and contraceptive  
15 services.

16

17 **Address correspondence:** Sophie Pascoe  
18 [spascoe@heroza.org](mailto:spascoe@heroza.org)  
19 39 Empire Road  
20 Parktown, 2193  
21 Johannesburg, South Africa.

22

23 **Funding statement:** Research reported in this publication was supported by the  
24 United States Agency for International Development  
25 (INROADS USAID 674-1-12-00029 & EVIDENCE USAID  
26 72067419CA00004). LL was partially supported by the  
27 National Institute of Mental Health of the National Institutes  
28 of Health (K01MH119923). The content is solely the  
29 responsibility of the authors and does not necessarily  
30 represent the official views of the funders. The funders had  
31 no role in study design, data collection and analysis, decision  
32 to publish, or preparation of the manuscript.

33

34 **Key words:** Discrete choice experiment; South Africa; HIV; Adolescent;  
35 Schools.

**NOTE:** This preprint reports new research that has not been certified by peer review and should not be used to guide clinical practice.

36

37 **Word count (manuscript):** **XXX** (Max 3500)

38 **Word count (abstract):** **349** (Max 350)

39

40

41 **Abstract**

42 **Background:** Many Adolescents in Sub-Saharan Africa don't access HIV and reproductive health  
43 services optimally. To improve uptake of these services, it is important to understand the students'  
44 preferences for how services are delivered so that implementation strategies can reflect this.

45

46 **Methods:** A discrete choice experiment (DCE) was used to elicit preferences. The DCE was conducted  
47 in 10 high schools situated in neighbourhoods of varying socio-economic status (SES) in Gauteng  
48 (South Africa). Students aged  $\geq 15$  years (Grades 9-12) were consented and enrolled in the DCE.  
49 Conditional logistic regression was used to determine preferred attributes for HIV and contraceptive  
50 service delivery. Results were stratified by gender and neighbourhood SES quintile. (1=Lowest SES;  
51 5=Highest SES).

52

53 **Results:** The DCE was completed between 07/2018-09/2019; 805 students were enrolled (67%  
54 female; 66% 15-17 years; 51% in grades 9-10). 54% of students in quintile 1 schools had no monthly  
55 income; 38% in quintile 5 schools had access to USD7 per month. Preferences were similar for male  
56 and female students. Students strongly preferred services provided by friendly, non-judgmental staff  
57 (Odds ratio 1.63; 95% Confidence Interval: 1.55-1.72) where confidentiality was ensured (1.33; 1.26-  
58 1.40). They preferred services offered after school (1.14; 1.04-1.25) with value-added services like  
59 free Wi-Fi (1.19; 1.07-1.32), food (1.23; 1.11-1.37) and youth-only waiting areas (1.18; 1.07-1.32).  
60 Students did not have a specific location preference, but preferred not to receive services within the  
61 community (0.82; 0.74-0.91) or school (0.88; 0.80-0.96). Students attending schools in high SES  
62 neighbourhoods expressed a preference for private care (1.15; 0.98-1.35). Costs to access services  
63 were a deterrent for most students irrespective of school neighbourhood; female students were  
64 deterred by costs  $\geq$ USD3 (0.79; 0.70-0.91); males by costs  $\geq$ USD7 (0.86; 0.74-1.00)

65

66 **Conclusions:** Preferences that encourage utilisation of services do not significantly differ by gender or  
67 school neighbourhood SES. Staff attitude and confidentiality are key issues affecting students'  
68 decisions to access HIV and contraceptive services. Addressing how healthcare providers respond to  
69 young people seeking sexual and reproductive health services is critical for improving adolescents'  
70 uptake of these services.

71

72

73 **Introduction**

74 Poor reproductive health outcomes among adolescents remain a public health concern in sub-  
75 Saharan Africa. Many young people continue to face challenges associated with sexually transmitted  
76 infections, including HIV as well as unintended pregnancies(1,2). In South Africa, according to the  
77 2016 South African Demographic Health Survey, 16% of adolescent girls aged 15-19 years were  
78 mothers or pregnant (3), in 2020 almost 4% of births (33,899) were to mothers aged 17 and younger  
79 and in 2019, approximately 36% of all new HIV infections occurred in young people aged 15-24  
80 years(4).

81  
82 South Africa has made a host of essential sexual and reproductive health (SRH) services available to  
83 adolescents. To facilitate this South Africa created a legal framework that allows adolescents to  
84 access these services including HIV testing and most recently PrEP (5) without consent from parents  
85 or legal guardians(6). In 2012, the South African Department of Basic Education (DBE) and  
86 Department of Health (DOH) implemented the Integrated School Health Program (ISHP) which offers  
87 learners a comprehensive health service package through the school, which included SRH services  
88 for older students, and promotes access to local primary health clinics(7).

89  
90 Despite these efforts, youth's utilization of HIV and contraceptive services remains low(8,9) and STIs,  
91 HIV infection and pregnancy, remain an issue amongst adolescents(10). This suggests a  
92 misalignment between the services offered offering and adolescents' preferences. There is a  
93 growing body of research examining which aspects of SRH service delivery influence a young  
94 person's decision to access services. It appears that confidentiality of services, stigma from health  
95 workers, operating hours, and costs of accessing services are all barriers to access(11–13). Other  
96 work has investigated facilitators for adolescent use of services such as making Wi-Fi available in  
97 waiting rooms at clinics and incentivizing youths in other ways, including money (13–15). This work  
98 offers insight into barriers and facilitators for youth accessing health services, but does not  
99 specifically address how best to position comprehensive SRH services for school going youth.

100  
101 We aim to address this gap in the literature by eliciting the preferences of school going adolescents,  
102 ≥15 years, in Johannesburg, (Gauteng, South Africa) for the delivery of HIV and SRH services. This will  
103 provide South African policy makers with insights into learner preferences and quantify the strength  
104 of those preferences for these services in order to improve the uptake of these services.

105

## 106 **Methods**

107 We conducted a discrete choice experiment (DCE) to determine the preferences of school going  
108 adolescents with respect to accessing SRH services. A DCE is a quantitative method used to elicit  
109 individuals' preferences for certain choice sets by examining the trade-offs that individuals make  
110 between the tangible and intangible attributes of goods and services (16,17). The premise of a DCE is  
111 that choice is motivated by differences in the attributes and allows us to analyse the drivers of choice  
112 and weight the importance of different attributes (18).

113

### 114 ***Generating attributes and levels***

115 To identify attributes of SRH service delivery models that are important to learners we conducted a  
116 literature review and qualitative research (focus group discussions (FGD) and stakeholder  
117 interviews). The literature review informed the development of research tools for the FGDs and  
118 interviews. We conducted FGDs with learners to establish their experiences and opinions of SRH  
119 service delivery. This was supplemented with interviews from key stakeholders (principals, teachers,  
120 parents, representatives of DBE and DOH). Based on the qualitative work, we generated an  
121 exhaustive list of service delivery attributes that school-going adolescents found important for  
122 decision-making. It is good practice to limit attributes for inclusion in the DCE survey to avoid  
123 decision fatigue, maximize comprehension and reduce survey completion time (17). We identified  
124 eight attributes each with two to four levels - location, operating times, health care provider  
125 characteristics, staff attitude, confidentiality, value added services, types of services offered and  
126 cost. The levels within each attribute were mutually exclusive and collectively exhaustive. The  
127 attributes are described in more detail with their respective levels in **Figure a1 in the Appendix**. We  
128 used the average annual exchange rate for 2018 for the South African Rand (ZAR) to United States  
129 dollar (USD) exchange rate for attribute 8 "Cost including travel" (ZAR1: USD13.2488).

130

### 131 ***Experimental design***

132 Of the eight attributes included in the DCE, six had four levels and two had two levels, resulting in  
133 16,384 possible combinations ( $4 \times 4 \times 4 \times 4 \times 4 \times 2 \times 2$ ). As it is not feasible to directly compare each  
134 possible combination we developed a fractional factorial design that was highly efficient, balanced  
135 and orthogonal, with a relative D-efficiency of 94% using SPSS version (19,20). The design was  
136 divided into four blocks of 9 choice sets, each with one repeat question in each block designed to  
137 test the internal validity of the instrument(21). We conducted an unlabelled DCE as this provided  
138 more variation in the choices. Instead of including an opt-out option for each question, we included  
139 a question to determine if learners would use the option they chose if it were available(17,22). We

140 piloted the tool with learners to ensure appropriateness and understanding of attributes and  
141 language.

142

### 143 ***Study population, study setting and sample size***

144 The population of interest was South African school-going adolescents in Gauteng Province and for  
145 the purposes of this study we defined adolescents as learners  $\geq 15$  years old. The study was  
146 conducted at ten purposively selected schools in Gauteng situated in low to moderate  
147 socioeconomic settings (SES) across all wealth quintiles 1-5 and areas with high HIV prevalence  
148 and/or high teenage pregnancy rates (as reported by the Department of Basic Education). We  
149 excluded schools where the DREAMS (Determined, Resilient, Empowered, AIDS-free, Mentored and  
150 Safe) initiative, a programme funded by USAID that seeks to prevent HIV/AIDS among adolescent  
151 girls and young women, was taking place as it sought to change attitudes and behaviours related to  
152 SRH. To estimate sample size, we followed the guidance provided by Johnson and Orme and asked  
153 each learner to complete 9 tasks (choice sets) involving a choice between 2 alternatives where each  
154 attribute had a maximum of 4 levels. Based on this the minimum sample size was estimated to be  
155 112 (20,23,24).

156

### 157 ***DCE recruitment and survey***

158 Study staff, with the help of school staff, went to all grade 9-12 classes at the selected schools to  
159 provide information on the study and all eligible students ( $\geq 15$  years) were invited to participate.  
160 and given informed consent documentation to take home. Younger students ( $< 18$  years) provided  
161 assent with parental consent, while older students ( $\geq 18$  years) were able to provide their own  
162 informed consent. Signed consent documentation was collected from the schools at separate visits.  
163 We booked the date, time and place for the survey and students who had provided consent and  
164 assent were invited to attend the DCE. On the day of the DCE, students were cross checked against a  
165 register to ensure that only consented students participated. Surveys took place in dedicated class  
166 rooms and 20-50 students participated simultaneously. **Figure 1** shows an example of a choice task.  
167 Each student was randomly assigned a DCE booklet (4 different blocks) with a corresponding answer  
168 sheet. Students self-administered the survey by shading in the correct answer on the answer sheet  
169 which had a unique identifier which could not be linked to the individual students. Data were  
170 extracted by scanning the answer sheets using Remark Office OMR software(25).

171

172

173

174 **Figure 1: Example of choice set**

| <b>RED</b>                         |                                                     |                                                         | <b>CHOICE STUDY: QUESTION 1</b> |  |
|------------------------------------|-----------------------------------------------------|---------------------------------------------------------|---------------------------------|--|
| CHARACTERISTIC                     | OPTION A                                            | OPTION B                                                |                                 |  |
| LOCATION                           | Picture removed<br>Private Doctor                   | Picture removed<br>Clinic                               |                                 |  |
| OPERATING TIMES                    | Picture removed<br>Weekday afternoon                | Picture removed<br>Weekday evening (4-8pm)              |                                 |  |
| HEALTH CARE PROVIDER               | Picture removed<br>Older HCP from outside community | Picture removed<br>Younger HCP from within community    |                                 |  |
| STAFF ATTITUDE                     | Picture removed<br>Unfriendly and judgemental       | Picture removed<br>Friendly, open and welcome           |                                 |  |
| CONFIDENTIALITY                    | Picture removed<br>Highly confidential              | Picture removed<br>Not very confidential                |                                 |  |
| INCENTIVES                         | Picture removed<br>None                             | Picture removed<br>Youth only waiting area and services |                                 |  |
| TYPE OF SERVICE                    | Picture removed<br>HIV testing and counselling only | Picture removed<br>All health services                  |                                 |  |
| COST OF SERVICE (including travel) | Picture removed<br><R100                            | Picture removed<br>Free                                 |                                 |  |

**1b. Would you use the option that you have chosen?**

175  
176  
177

178 **Statistical Analysis**

179 There were two primary data sets obtained from each participant: a) demographic characteristics  
180 and b) the results of the discrete experiment.

181

182 Descriptive statistics were used to summarize demographics. We summarized, baseline  
183 characteristics for each group as medians with interquartile ranges (IQR) and proportions.

184 We used a conditional logit model to determine the relationship between each level of an attribute  
185 and the choice that the participant made(13,26). The data set comprised two rows for each of the  
186 choice sets a participant was asked to evaluate, resulting in 18 (9 sets x 2) rows of data per  
187 participant. Each row included a variable (column) for each attribute level excluding the level used as  
188 the comparator. We made the level most similar to the standard of care (SOC) the comparator.  
189 Models were estimated with different interaction terms to test the effect of different socio-  
190 demographic factors on preferences. We stratified the data by gender, age and grade to explore the  
191 differences between these groups. Data analysis was conducted with STATA version 14.0 (Stata  
192 Corporation, College Station, TX, USA).

193

194 The study protocol was reviewed and approved by the Human Research Ethics Committee (Medical)  
195 (#170213) of the University of the Witwatersrand (HREC) and the Boston University Medical Campus  
196 Institutional Review Board (H-35987) of the Boston University School of Public Health. All  
197 participants provided written informed consent to participate in the study.

198 In outlining this study presentation, we have considered the ten items of the checklist for conjoint  
199 analysis in healthcare as described by Bridges at al (27).

200

201 **Results**

202 The DCE was carried out in ten schools and a total of 2,245 consent forms were given out. Most  
203 forms (59%) were given to female learners and 1,068 (47%) were signed and returned. 805 (75%) of  
204 those who provided consent attended the DCE. The reasons for not attending were not recorded.

205 **Figure a2 in the appendix** illustrates the flow of enrolments from consent to participation.

206

207 **Demographics**

208 **Table 1** presents the demographic characteristics for the 805 learners who completed the survey.  
209 Over two thirds (67%) of the participants were female. Around two thirds 530 (65.8%) of those  
210 learners who participated were aged 15-17 years, the remainder 272 (33.8%) being aged 18 years



211 and over. Just under half 351(43.9%) of participants reported that they had no monthly income that  
 212 they could access if needed.

213

214 **Table 1: Summary of demographics characteristics among learners**

| Characteristic | Level            | n=805      |
|----------------|------------------|------------|
| Age            | 15-17 years      | 530(65.8%) |
|                | 18 and older     | 272(33.8%) |
| Gender         | Female           | 534(66.7%) |
|                | Male             | 259(32.3%) |
|                | Other            | 8 (1.00%)  |
| Monthly Income | No income        | 351(43.9%) |
|                | ZAR10-50         | 168(21.0%) |
|                | ZAR51-100        | 102(12.8%) |
|                | More than ZAR100 | 179(22.4%) |

215

216

217 **Table 2 shows** participant characteristics in relation to their sexual behaviour and service access. A  
 218 total of 390 (49%) learners reported that they were sexually active, 54% of whom were female. Male  
 219 learners were however, more likely to report being sexually active (68%) than female learners (39%).  
 220 Among those reporting that they were sexually active, slightly less than half 185 (47.93%) reported  
 221 that they had had an HIV test in the 12 months preceding the survey and 292 (76%) reported having  
 222 tested for HIV before

223

224 **Table 2: HIV and contraceptive utilisation among learners who have never had sex and those who**  
 225 **have had sex**

| Characteristic                      | Level                 | Ever had sex | Never had sex |
|-------------------------------------|-----------------------|--------------|---------------|
| Accessed services in last 12 months | No                    | 119 (66.48%) | 131 (86.18 %) |
|                                     | Contraceptive service | 16 (8.94%)   | 2 (1.32 %)    |
|                                     | HIV services only     | 31 (17.32%)  | 19 (12.50 %)  |
|                                     | HIV and contraceptive | 13 (7.26%)   | 0 (0.00%)     |
| Ever had HCT                        | No                    | 33 (18.44%)  | 64 (41.29%)   |
|                                     | Yes                   | 146 (81.56%) | 91 (58.71%)   |
| HCT in last 12 months               | No                    | 48 (36.09%)  | 31 (35.63%)   |
|                                     | Yes                   | 85 (63.91%)  | 56 (64.37 %)  |

226

227

228

229

230

231 ***Discrete Choice Experiment***

232

233 Unstratified analysis

234 **Figure 2** shows the model for all learners. There was a preference for friendly health care providers  
235 (OR 1.63; 95% CI 1.55-1.72; p-value <0.01) and private and confidential services (OR 1.33; 95% CI 1.26-  
236 1.40; p-value <0.01). Provision of services outside of traditional clinics, such as in the community (OR:  
237 0.82; 95% CI 0.74-0.91; p-value <0.01) or in school (OR 0.88; 95% CI 0.80-0.96; p-value 0.01), was a  
238 deterrent. Learners preferred accessing services in the afternoon (OR 1.14; 95% CI 1.04-1.25; p-value  
239 <0.01) compared to in the morning. They were indifferent to the provider demographics, in terms of  
240 their age or where they were from. Any value-added service, such as youth only services and spaces  
241 (OR 1.13; 95% CI 1.03-1.24; p-value 0.01), Wi-Fi (OR 1.19; 95% CI 1.07-1.32; p-value <0.01), and access  
242 to food (OR 1.18; 95% CI 1.07-1.29; p-value <0.001), increased odds of choosing a service. Learners  
243 preferred the more comprehensive package of services (family planning and contraceptive services)  
244 (OR 1.17; 95% CI 1.07-1.28; p-value <0.001) with integrated health services (OR 1.12; 95% CI 1.02-  
245 1.23; p-value 0.01) as opposed to receiving condoms or HCT only. Cost only became a deterrent to  
246 accessing services at ZAR50 (USD 4) and above (OR = 0.84; 95% CI 0.76-0.93; p-value <0.01).

247

248

249

250

251

252

253

254

255

256

257

258

259

260

261

262

263

264

265 **Figure 2: model for all learners**

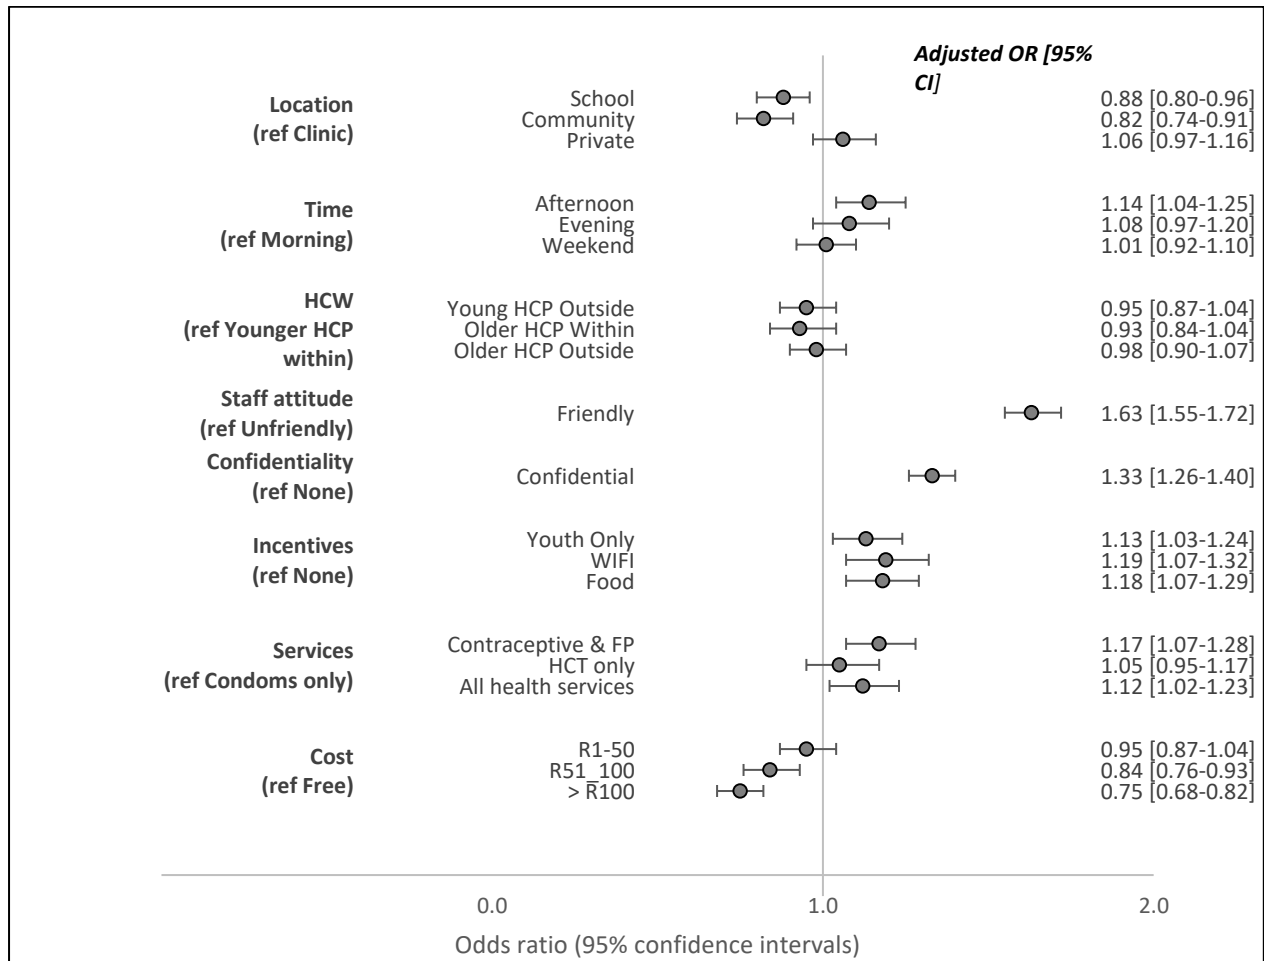

266

267

268 Stratified analysis

269 Analyses were then further stratified by gender and wealth quintile.

270

271 *Gender*

272 **Figure 3** shows the DCE results stratified by gender. Female learners preferred services to be provided  
 273 in the afternoon (OR: 1.15; 95% CI 1.03-1.28; p-value 0.02) whereas male learners showed no real  
 274 time preference. Female learners in particular had a strong preference for providers with a friendly  
 275 attitude (OR: 1.72; 95% CI 1.61-1.84; p-value <0.01) more so than males (OR: 1.48; 95% CI 1.35-1.61;  
 276 p-value <0.01). The cost of accessing services became a deterrent for girls at ZAR50 (OR:0.79; 95% CI  
 277 0.70-0.90; p-value <0.01) whilst for males cost only became a deterrent where it was above ZAR100  
 278 (OR: 0.86; 95% CI 0.74-1.00; p-value <0.06).

279

280 **Figure 3: DCE results stratified by gender**

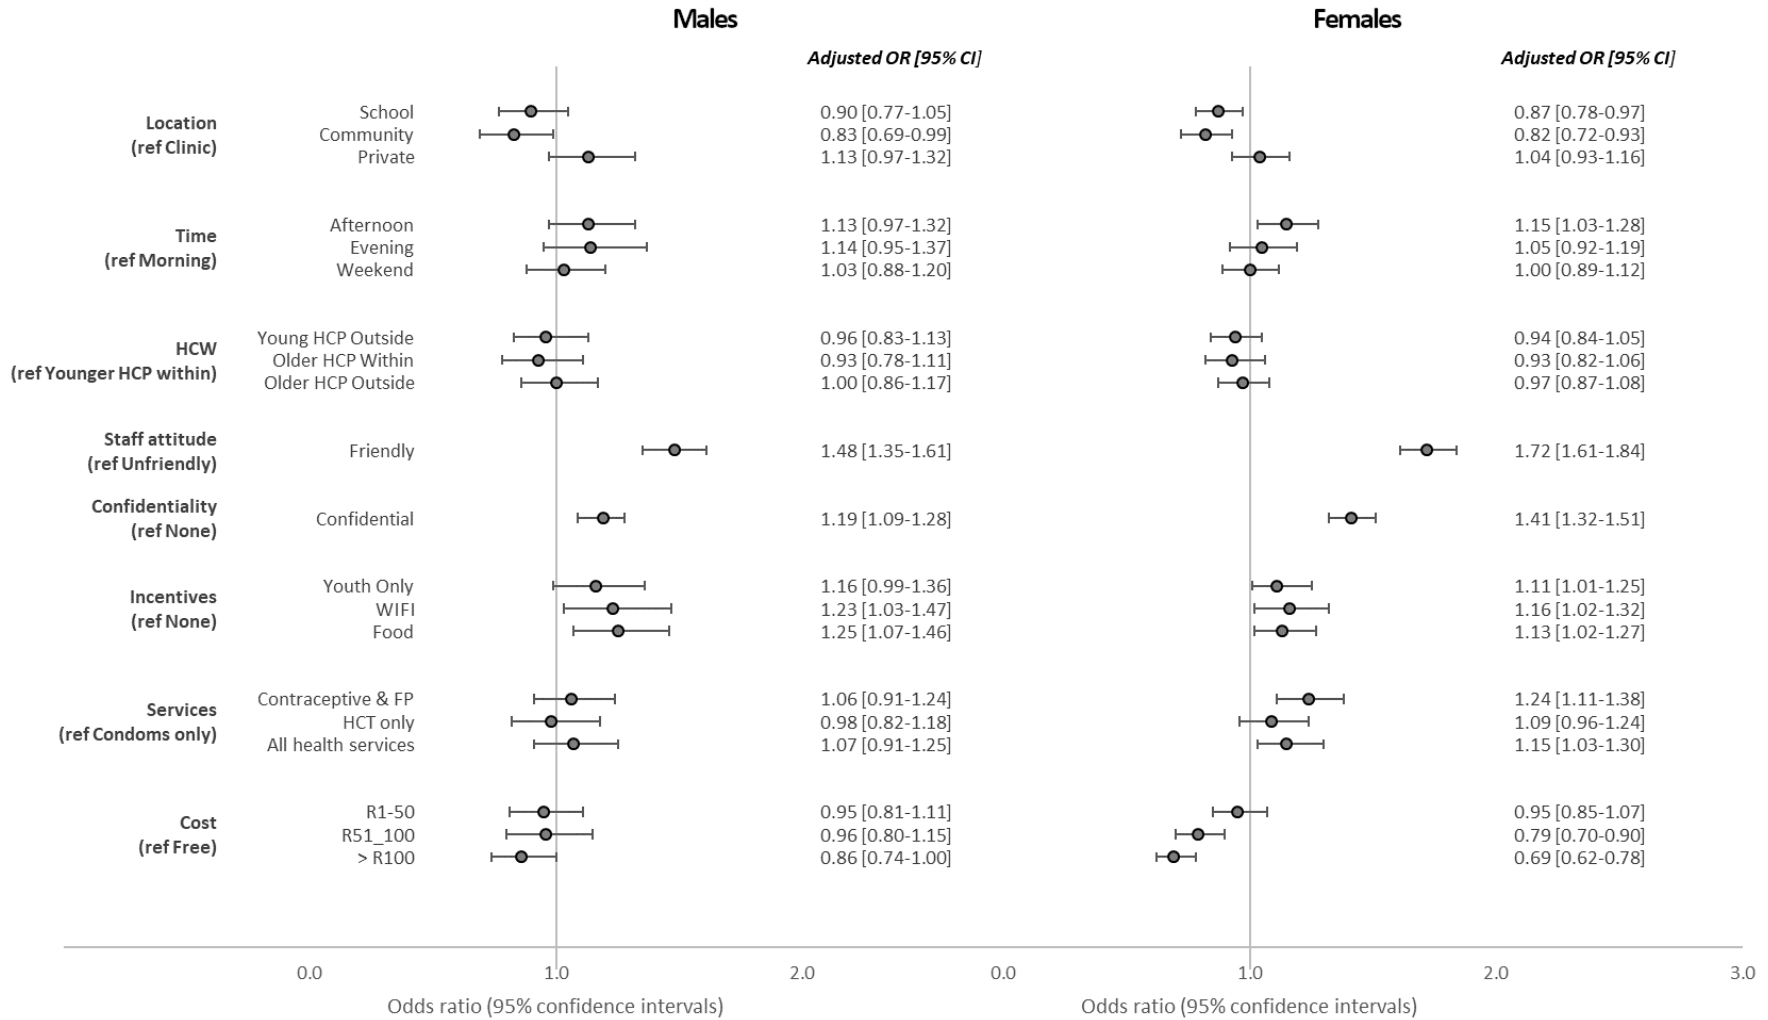

281

282  
283  
284  
285  
286  
287  
288  
289  
290  
291  
292  
293  
294  
295  
296  
297  
298  
299  
300  
301  
302  
303  
304  
305  
306  
307  
308  
309  
310  
311  
312  
313  
314  
315

*SES status (quintiles)*

**Figure 4** shows the DCE results stratified by quintiles. Friendly attitude and confidential services remained the most important attributes across quintiles. Providing services outside of traditional clinics, such as in schools (OR: 0.80; 95% CI 0.69-0.94; p-value 0.01) or communities (OR: 0.71; 95%CI 0.59-0.85; p-value <0.01) was a deterrent among those in higher wealth quintiles but did not appear to be a deterrent in lower wealth quintiles. While availability of cheap food and youth only waiting areas remained as a preference across quintiles, free Wi-Fi was only important to learners as an incentive for accessing these services in the lower quintiles (OR: 1.22; 95% CI 1.07-1.39; p-value <0.01). Learners in lower quintiles were willing to pay up-to R100 for services whilst higher quintiles had a lower willingness to pay (OR: 0.82; 95%CI 0.73-0.92; p-value <0.01) for >R100 vs (OR: 0.72; 95%CI 0.60-0.86; p-value <0.01) for R51-100.

316 **Figure 4: DCE results stratified by quintile**

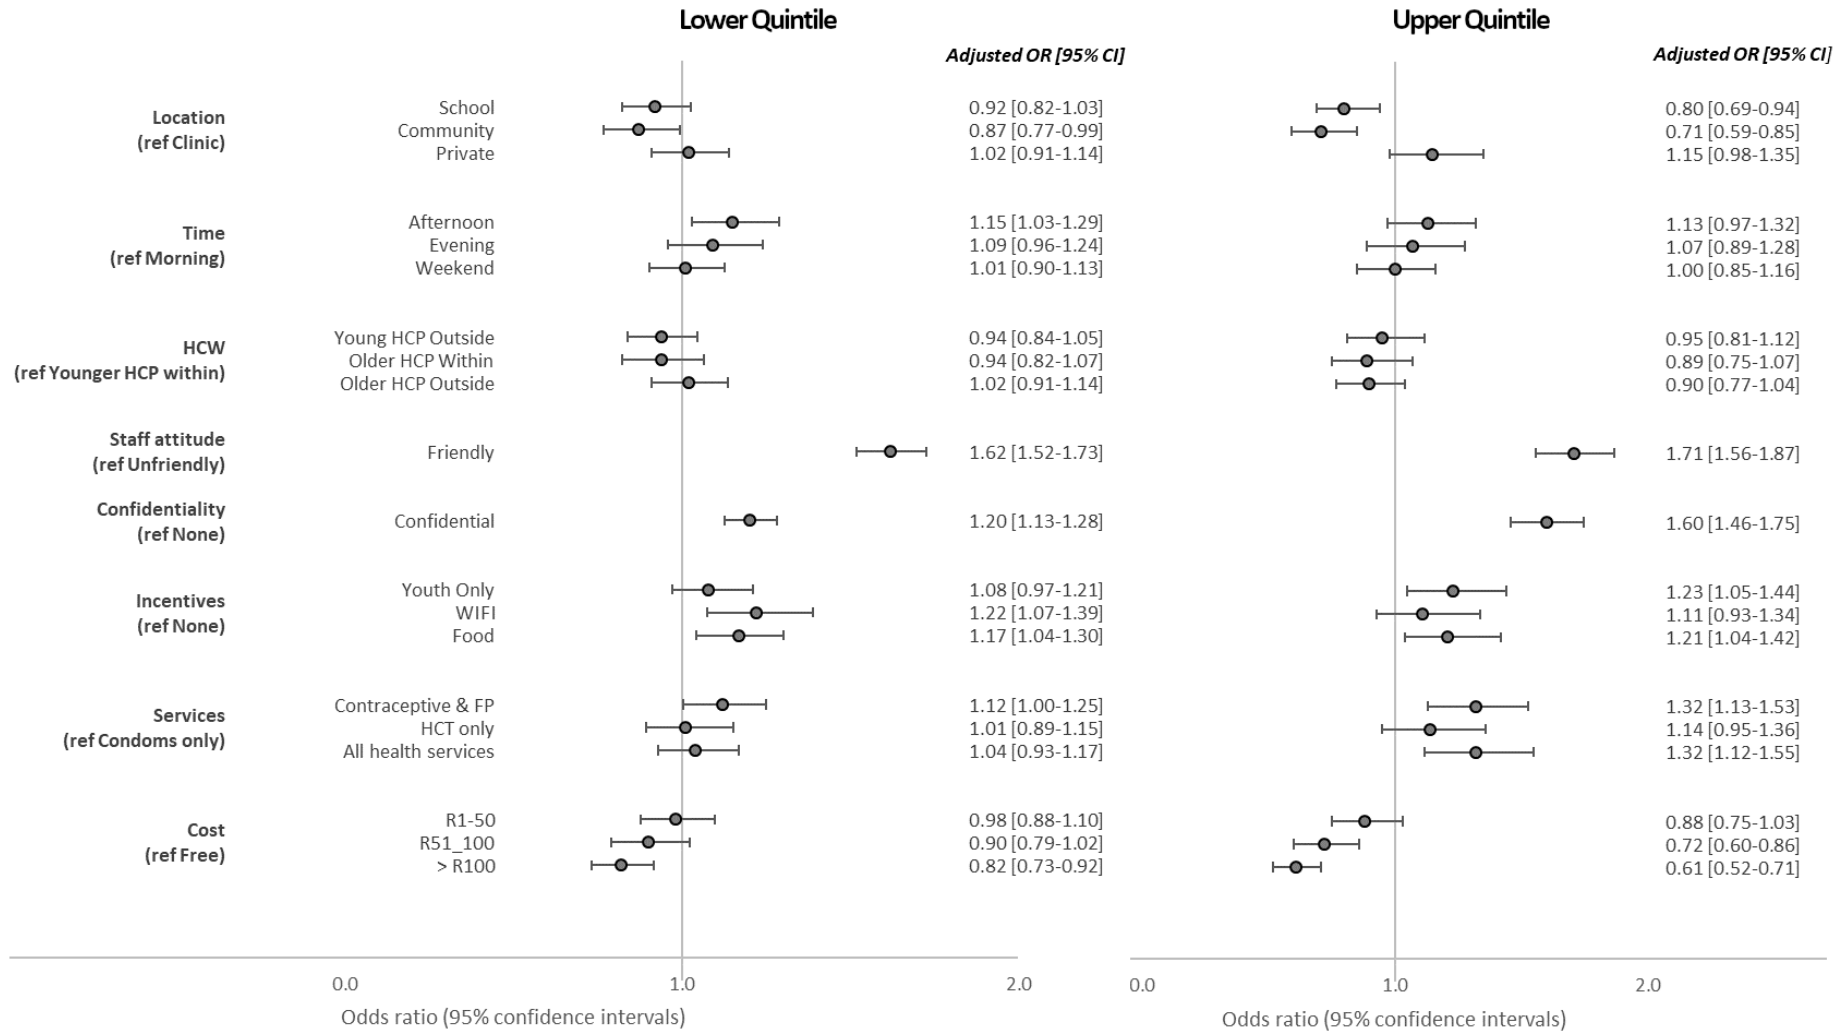

317

## 318 Discussion

319 The DCE results indicate that friendliness, privacy and confidentiality are strong drivers of choice for  
320 adolescent use of SRH and HIV services. The importance of staff attitudes for increasing demand and  
321 utilization of services by learners was consistent across socio-economic status and gender.

322 This aligns with results from other studies that report poor staff attitude and lack of confidentiality  
323 as main barriers to utilization of HIV and contraceptive services among different populations (youth  
324 included)(28–31). However, here we quantify the strength of these preferences, showing that  
325 learners are potentially 1.6 times more likely to use services that are friendly. The strength of  
326 preferences however does vary by gender. For example, female learners showed a stronger  
327 preference for services that are friendly and confidential than male learners. This may be because  
328 females bear the brunt of health provider prejudices and cultural ideologies that shame girls for any  
329 sexual behaviour(9). In addition, they have the ultimate burden of preventing or carrying a  
330 pregnancy.

331

332 We constructed the DCE questionnaire to include an attribute on services available and varied the  
333 levels to indicate either individual services like HIV testing only or more comprehensive package of  
334 services that included contraceptive services, HIV testing and treatment. Learners, especially  
335 females preferred a more integrated service provision, that would include provision of HIV testing,  
336 STI management, contraception services and family planning services.

337

338 Previous literature has demonstrated that high rates of HIV and SRH service utilization among  
339 adolescents could be achieved by providing these HIV and SRH services within schools (11,32–34). In  
340 light of this evidence, the South African government has taken steps towards providing HIV and  
341 contraceptive services in schools under the Integrated School Health Programme (12). Not only is  
342 there resistance to this from some parents, it is difficult to implement and resource intensive. Our  
343 findings are that learners prefer that these services are not provided in schools or in communities and  
344 this is consistent across SES and gender. This could be because learners fear stigma and unintended  
345 loss of privacy and confidentiality that might result from provision of service in school. Students also  
346 seem willing to forego the convenience of a school location for friendly and confidential services  
347 anywhere, with accessible operating hours. This may be because clinics are generally well located in  
348 Johannesburg with fairly good travel access. Results from the qualitative phase of our DCE suggested  
349 that younger health providers were seen as more friendly, confidential and more relatable. The DCE  
350 results though did not identify age of the provider as an important predictor of choice. It may be that

351 age of providers was viewed as a proxy for friendly and confidential service, but on weighing these  
352 attributes against each other age of provider was less important.

353

354 Cost of care (transport, food, etc.) has been shown to be a major barrier to health utilisation among  
355 youths and adolescents(29,35). In the DCE, cost of accessing services was included as a separate  
356 attribute. While some learners showed a willingness to pay a small amount to access services, cost  
357 influenced the choices of learners across all quintiles. Male learners had a higher willingness to pay  
358 for services than females. This may be that males have more access to money than females. Learners  
359 from lower wealth quintiles seemed more willing to pay for some services than learners from higher  
360 wealth quintiles. This may be because people often equate payment for care with higher quality care  
361 (36).

362

363 Facility operating hours are often barriers to utilization of services and “special” service hours may  
364 offer opportunity for more private and confidential services for who seen accessing services(14,15)  
365 They may also help reduce waiting times, another important barrier to health utilisation among young  
366 people (29). We saw a strong preference for accessing services in the afternoon but not for the  
367 evening. which may be due to concerns around safety and curfews on the part of the learners and  
368 also the lack of public transport later in the day. Operating times were important for learners in  
369 schools in lower wealth areas and also for female learners with the odds of choice being 1.15 times  
370 higher if services were offered in the afternoon.

371

372 A major finding in this study is that value added services like youth only waiting areas, cheap food  
373 and Wi-Fi could increase the odds of services being utilized. Interestingly, availability of Wi-Fi would  
374 be more likely to impact learners from lower wealth quintile schools where they are less likely to  
375 have easy access to Wi-Fi in their homes or schools. However, it is also less likely that clinics in these  
376 areas have consistent internet access and so this network connectivity would need to be addressed  
377 before access to Wi-Fi is possible. to The ISHP and the Adolescent SRH Policy in South Africa point to  
378 the need for “youth friendly” care. This includes the need for confidential, friendly services; youth-  
379 only zones; and the need to address the broader social (and food) needs (7). These policies are  
380 however often poorly implemented and are dependent on collaboration and partnership between  
381 government departments and directorates.

382

383 Few studies have looked at preferences for SRH and HIV services among adolescents using the DCE  
384 method (13,35,37) . Strauss et al (13) conducted an unlabelled DCE looking specifically at preferences



385 for HIV counselling and Testing services in South Africa and Michaels-Igbokwe (35) looked at  
386 preferences for family planning in Malawi using a labelled DCE. Both studies found staff attitude and  
387 confidentiality to be major deterrents to use of these services. The results in this study confirm that  
388 youth value friendliness and confidentiality above all other attributes. Value added services like free  
389 Wi-Fi and youth only waiting areas and accessible operational times also increase the odds of using a  
390 service. Future work should explore how the models of care can be tailored to incorporate these  
391 preferences and increase demand and utilisation of HIV and SRH services. It would also be useful to  
392 explore the cost of different adaptations and how these changes might influence utilisation.

393

### 394 **Strengths & Limitations**

395 A DCE allows for the quantification and weighing of attributes against each other so that we can  
396 determine which preferences to prioritise. This study is one of few studies that have employed this  
397 method among adolescents and specifically school-going adolescents. The use of extensive qualitative  
398 data to inform our DCE design gives us confidence that although these are stated preferences, the  
399 results are relevant and meaningful and would likely reflect in revealed preferences although that  
400 would need to be explored.

401

402 A potential limitation of the DCE is the cognitive burden on the participant as they have to think  
403 through many choice sets, which may result in inaccurate responses (38). We did try to mitigate this  
404 by using the block design which minimized the number of choice sets they had to complete and  
405 allowed us to maximise the number of choice sets completed across the sample (39).

406

407 The results may not be generalizable to other provinces, but we are confident that within Gauteng,  
408 the schools selected are representative of schools across the province. The study was conducted in 10  
409 different schools, across 3 different wealth quintiles representing the socioeconomic status of the  
410 school neighbourhoods. This was an advantage although neighbourhood SES was not always  
411 representative of the wealth of the school and some of the poorer schools were in the wealthier  
412 neighbourhoods.

413

414 Our study focused on learners aged 15 and above. It is important to investigate preferences of learners  
415 between 12 and 15 years of age as they are by law allowed to access these services without parental  
416 consent. Unfortunately, this vulnerable population can often be hard to reach due to issues of consent  
417 and unintended disclosure of learners' sexual information to parents and guardians making it hard to  
418 enrol these younger learners and fully explore their preferences.

419

420 **Conclusion**

421 While there are many interventions and programs that are aimed at providing services to young  
422 people in SA, effort needs to be geared towards making sure that young people are a first point of  
423 consultation when trying to understand their preferences for accessing health services. Addressing  
424 health system and structural issues to assist young people to easily access health services is also  
425 imperative. The results from this study quantified the preferences of learners for accessing health  
426 services such as how health-care providers respond to young people seeking HIV-testing,  
427 contraceptives and sexual and reproductive health advice. If we are going to increase uptake of  
428 these services among adolescent it is critical that we address these issues. Adolescents must be able  
429 to access comprehensive, holistic HIV and SRH services at convenient times and value-added  
430 services like free Wi-Fi and youth only waiting areas may increase utilisation potentially by as much  
431 as 10 to 20 percent.

432

433 **Competing interests [Mandatory]**

434 The authors declare that they have no competing interests.

435

436

437 **Authors' contributions [Mandatory]**

438 CG NLD and LL SP and AM conceptualized and designed the study. CG conducted the analysis. CG  
439 prepared the original draft. CG, LL, NLD, AM, CM, NN, SMN and SP reviewed and edited the draft.

440

441 **Acknowledgements [Mandatory]**

442 We would like to thank the Department of Basic Education, the educators and heads of school at the  
443 schools we conducted the research for their support and contribution to the success of the study.

444

445 **Funding:**

446 This study was made possible by the generous support of the American People and the President's  
447 Emergency Plan for AIDS Relief (PEPFAR) through US Agency for International Development (USAID)  
448 under the terms of Cooperative Agreements AID-674-A-12-00029 and 72067419CA00004 to Health  
449 Economics and Epidemiology Research Office. LL was supported by the National Institute of Mental  
450 Health of the National Institutes of Health under grant number K01MH119923. The contents are the  
451 responsibility of the authors and do not necessarily reflect the views of the NIH, PEPFAR, USAID or

452 the United States Government. The funders had no role in the study design, collection, analysis and  
453 interpretation of the data, in manuscript preparation or the decision to publish.

454

455

## 456 **References**

- 457 1. Yakubu I, Salisu WJ. Determinants of adolescent pregnancy in sub-Saharan Africa: A  
458 systematic review [Internet]. Vol. 15, Reproductive Health. BioMed Central Ltd.; 2018 [cited  
459 2021 Jul 3]. Available from: [/pmc/articles/PMC5787272/](https://pubmed.ncbi.nlm.nih.gov/35787272/)
- 460 2. Santhya KG, Jejeebhoy SJ. Sexual and reproductive health and rights of adolescent girls:  
461 Evidence from low- and middle-income countries. Glob Public Health [Internet]. 2015 Feb 7  
462 [cited 2021 Jul 3];10(2):189–221. Available from: [/pmc/articles/PMC4318087/](https://pubmed.ncbi.nlm.nih.gov/264318087/)
- 463 3. Africa S. Demographic and Health Survey 2016 Key Findings [Internet]. [cited 2021 Jul 4].  
464 Available from: [www.DHSprogram.com](http://www.DHSprogram.com).
- 465 4. AIDSinfo | UNAIDS [Internet]. [cited 2021 Jul 4]. Available from: <http://aidsinfo.unaids.org/>
- 466 5. South Africa National Department of Health. Guidelines for Expanding Combination  
467 Prevention and Treatment Options for Sex Workers: Oral Pre-Exposure Prophylaxis (PrEP) and  
468 Test and Treat (T&T). 2016;(May):30. Available from: [http://www.nicd.ac.za/assets/files/PrEP](http://www.nicd.ac.za/assets/files/PrEP%20and%20TT%20Guidelines%20-%20Final%20Draft%20-%2011%20May%202016.pdf)  
469 [and TT Guidelines - Final Draft - 11 May 2016.pdf](http://www.nicd.ac.za/assets/files/PrEP%20and%20TT%20Guidelines%20-%20Final%20Draft%20-%2011%20May%202016.pdf)
- 470 6. Neumaier J. First biosimilar infliximab approved. MMW Fortschr Med. 2015;157(June  
471 2006):88.
- 472 7. National Department of Health, Education D of B. Integrated Health Policy.
- 473 8. Frohlich JA, Mkhize N, Dellar RC, Mahlase G, Montague CT, Karim QA. Meeting the sexual and  
474 reproductive health needs of high-school students in South Africa: Experiences from rural  
475 Kwazulu-Natal. South African Med J. 2014 Oct 1;104(10):687–90.
- 476 9. Chimbindi N, Mthiyane N, Birdthistle I, Floyd S, McGrath N, Pillay D, et al. Persistently high  
477 incidence of HIV and poor service uptake in adolescent girls and young women in rural  
478 KwaZulu-Natal, South Africa prior to DREAMS. PLoS One [Internet]. 2018 Oct 1 [cited 2021 Jul  
479 4];13(10):e0203193. Available from: <https://doi.org/10.1371/journal.pone.0203193.g001>
- 480 10. South African National HIV Prevalence, Incidence, Behaviour and Communication Survey.  
481 2017 [cited 2021 Sep 15]; Available from: [www.riener.com](http://www.riener.com)
- 482 11. Cluver L, Shenderovich Y, Toska E, Rudgard WE, Zhou S, Orkin M, et al. Clinic and care:  
483 associations with adolescent antiretroviral therapy adherence in a prospective cohort in  
484 South Africa. AIDS. 2021;35(8):1263–71.
- 485 12. Abubakari Sulemana W, Abu M, Yidana Z, Apraku Anane E, Mutaru Goro I, Badasu Delalali M.  
486 Young people’s experiences in accessing sexual and reproductive health services in sub-  
487 Saharan Africa from 1994 to 2019 - A content analysis. Int J Sex Reprod Heal Care. 2020 May  
488 22;3(1):017–26.
- 489 13. Strauss M, George GL, Rhodes BD. Determining Preferences Related to HIV Counselling and

- 490 Testing Services Among High School Learners in KwaZulu-Natal: A Discrete Choice  
491 Experiment. *AIDS Behav.* 2016;1–13.
- 492 14. HIV TREATMENT, CARE, AND SUPPORT FOR ADOLESCENTS LIVING WITH HIV IN EASTERN AND  
493 SOUTHERN AFRICA A review of interventions for scale.
- 494 15. Ninsiima LR, Chiumia IK, Ndejjo R. Factors influencing access to and utilisation of youth-  
495 friendly sexual and reproductive health services in sub-Saharan Africa: a systematic review.  
496 *Reprod Heal* 2021 181 [Internet]. 2021 Jun 27 [cited 2021 Sep 15];18(1):1–17. Available from:  
497 [https://reproductive-health-journal.biomedcentral.com/articles/10.1186/s12978-021-01183-](https://reproductive-health-journal.biomedcentral.com/articles/10.1186/s12978-021-01183-y)  
498 [y](https://reproductive-health-journal.biomedcentral.com/articles/10.1186/s12978-021-01183-y)
- 499 16. De Bekker-Grob EW, Ryan M, Gerard K. Discrete choice experiments in health economics: A  
500 review of the literature. *Health Econ.* 2012;21:145–72.
- 501 17. Mangham LJ, Hanson K, McPake B. How to do (or not to do)...Designing a discrete choice  
502 experiment for application in a low-income country. *Health Policy Plan.* 2009;24(2):151–8.
- 503 18. Hauber AB, González JM, Groothuis-Oudshoorn CGM, Prior T, Marshall DA, Cunningham C, et  
504 al. Statistical Methods for the Analysis of Discrete Choice Experiments: A Report of the ISPOR  
505 Conjoint Analysis Good Research Practices Task Force. *Value Heal* [Internet]. 2016 Jun [cited  
506 2019 Jun 12];19(4):300–15. Available from:  
507 <https://linkinghub.elsevier.com/retrieve/pii/S1098301516302911>
- 508 19. Zwerina K, Huber J, Kuhfeld WF. A General Method for Constructing Efficient Choice Designs.  
509 [cited 2021 Sep 15]; Available from:  
510 [http://support.sas.com/resources/papers/tnote/tnote\\_marketresearch.html](http://support.sas.com/resources/papers/tnote/tnote_marketresearch.html).
- 511 20. Johnson FR, Lancsar E, Marshall D, Kilambi V, Mühlbacher A, Regier DA, et al. Constructing  
512 Experimental Designs for Discrete-Choice Experiments: Report of the ISPOR Conjoint Analysis  
513 Experimental Design Good Research Practices Task Force. *Value Heal.* 2013 Jan 1;16(1):3–13.
- 514 21. Johnson FR, Yang JC, Reed SD. The Internal Validity of Discrete Choice Experiment Data: A  
515 Testing Tool for Quantitative Assessments. *Value Heal.* 2019 Feb 1;22(2):157–60.
- 516 22. De Bekker-Grob EW, Hol L, Donkers B, Van Dam L, Habbema JDF, Van Leerdam ME, et al.  
517 Labeled versus Unlabeled Discrete Choice Experiments in Health Economics: An Application  
518 to Colorectal Cancer Screening. *Value Heal.* 2010 Mar 1;13(2):315–23.
- 519 23. Johnson R, Orme B. Getting the Most from CBC. 1996 [cited 2021 Oct 6]; Available from:  
520 [www.sawtoothsoftware.com](http://www.sawtoothsoftware.com)
- 521 24. De Bekker-Grob EW, Donkers B, Jonker MF, Stolk EA. Sample Size Requirements for Discrete-  
522 Choice Experiments in Healthcare: a Practical Guide. 2015;
- 523 25. Remark Office OMR Software · Remark Software [Internet]. [cited 2022 May 6]. Available

- 524 from: <https://remarksoftware.com/products/office-omr/>
- 525 26. Hauber AB, González JM, Groothuis-Oudshoorn CGM, Prior T, Marshall DA, Cunningham C, et  
526 al. Statistical Methods for the Analysis of Discrete Choice Experiments: A Report of the ISPOR  
527 Conjoint Analysis Good Research Practices Task Force. *Value Heal* [Internet]. 2016;19(4):300–  
528 15. Available from: <http://dx.doi.org/10.1016/j.jval.2016.04.004>
- 529 27. Bridges JFP, Hauber AB, Marshall D, Lloyd A, Prosser LA, Regier DA, et al. Conjoint analysis  
530 applications in health - A checklist: A report of the ISPOR Good Research Practices for  
531 Conjoint Analysis Task Force. *Value Heal* [Internet]. 2011 [cited 2022 May 9];14(4):403–13.  
532 Available from: <http://www.ispor.org/TaskForces/ConjointAnalysisGRP>
- 533 28. Tilahun M, Mengistie B, Egata G, Reda AA. Health workers' attitudes toward sexual and  
534 reproductive health services for unmarried adolescents in Ethiopia. *Reprod Health*. 2012;9(1).
- 535 29. Musakwa NO, Bor J, Nattey C, Lönnemark E, Nyasulu P, Long L, et al. Perceived barriers to  
536 the uptake of health services among first-year university students in Johannesburg, South  
537 Africa. *PLoS One*. 2021;16(1 January):1–14.
- 538 30. Robert K, Maryline M, Jordan K, Lina D, Helgar M, Annrita I, et al. Factors influencing access of  
539 HIV and sexual and reproductive health services among adolescent key populations in Kenya.  
540 *Int J Public Health* [Internet]. 2020 May 1 [cited 2022 May 9];65(4):425. Available from:  
541 </pmc/articles/PMC7275021/>
- 542 31. Bogart LM, Chetty S, Giddy J, Sypek A, Sticklor L, Walensky RP, et al. Barriers to Care among  
543 People Living with HIV in South Africa: Contrasts between Patient and Healthcare Provider  
544 Perspectives. *AIDS Care* [Internet]. 2013 [cited 2022 May 9];25(7):843. Available from:  
545 </pmc/articles/PMC3552028/>
- 546 32. Avedian A. South African National HIV Prevalence, Incidence, Behaviour and communication  
547 survey, 2017. 2018;1–17.
- 548 33. Integrated School Health Policy.
- 549 34. Mendelsohn AS, Gill K, Marcus R, Robbertze D, Van de Venter C, Mendel E, et al. Sexual  
550 reproductive healthcare utilisation and HIV testing in an integrated adolescent youth centre  
551 clinic in Cape Town, South Africa. *South Afr J HIV Med*. 2018 Nov 26;19(1).
- 552 35. Michaels-Igbokwe C, Terris-Prestholt F, Lagarde M, Chipeta E, the Integra Initiative, Cairns J.  
553 Young People's Preferences for Family Planning Service Providers in Rural Malawi: A Discrete  
554 Choice Experiment. *PLoS One*. 2015;1–18.
- 555 36. Chiwire P, Evers SM, Mahomed H, Hilgsmann M. Willingness to pay for primary health care  
556 at public facilities in the Western Cape Province, Cape Town, South Africa.  
557 <https://doi.org/101080/1369699820211877147> [Internet]. 2021 [cited 2022 Jul 6];24(1):162–

- 558 72. Available from: <https://www.tandfonline.com/doi/abs/10.1080/13696998.2021.1877147>
- 559 37. Chetty-Makkan CM, Hoffmann CJ, Charalambous S, Botha C, Ntshuntshe S, Nkosi N, et al.  
560 Youth Preferences for HIV Testing in South Africa: Findings from the Youth Action for Health  
561 (YA4H) Study Using a Discrete Choice Experiment. *AIDS Behav* [Internet]. 2021;25(1):182–90.  
562 Available from: <https://doi.org/10.1007/s10461-020-02960-9>
- 563 38. Pearce A, Harrison M, Watson V, Street DJ, Howard K, Bansback N, et al. Respondent  
564 Understanding in Discrete Choice Experiments: A Scoping Review [Internet]. Vol. 14, Patient.  
565 Springer International Publishing; 2021. 17–53 p. Available from:  
566 <https://doi.org/10.1007/s40271-020-00467-y>
- 567 39. Lancsar E, Louviere J. Conducting discrete choice experiments to inform healthcare decision  
568 making: A user’s guide [Internet]. Vol. 26, *PharmacoEconomics*. *Pharmacoeconomics*; 2008  
569 [cited 2021 May 23]. p. 661–77. Available from: <https://pubmed.ncbi.nlm.nih.gov/18620460/>  
570
